## Research Article

# Bioinformatics analysis revealing prognostic significance of *RRM2* gene in breast cancer

 Wei-xian Chen<sup>1</sup>, Liang-gen Yang<sup>2</sup>, Ling-yun Xu<sup>1</sup>, Lin Cheng<sup>1</sup>, Qi Qian<sup>1</sup>, Li Sun<sup>1</sup> and Yu-lan Zhu<sup>1</sup>

<sup>1</sup>Department of Breast Surgery, The Affiliated Changzhou No. 2 People's Hospital of Nanjing Medical University, Changzhou 213000, Jiangsu Province, China; <sup>2</sup>Graduate School of Nanjing Medical University, Nanjing 210000, Jiangsu Province, China

**Correspondence:** Wei-xian Chen (chenweixian@njmu.edu.cn)

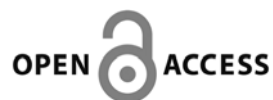

**Background:** Ribonucleotide reductase M2 subunit (*RRM2*) plays vital roles in many cellular processes such as cell proliferation, invasiveness, migration, angiogenesis, senescence, and tumorigenesis. However, the prognostic significance of *RRM2* gene in breast cancer remains to be investigated. **Methods:** *RRM2* expression was initially evaluated using the Oncomine database. The relevance between *RRM2* level and clinical parameters as well as survival data in breast cancer was analyzed using the Kaplan–Meier Plotter, PrognosScan, and Breast Cancer Gene-Expression Miner (bc-GenExMiner) databases. **Results:** *RRM2* was overexpressed in different subtypes of breast cancer patients. Estrogen receptor (ER) and progesterone receptor (PR) were negatively correlated with *RRM2* expression. Conversely, the Scarff–Bloom–Richardson (SBR) grade, Nottingham prognostic index (NPI), human epidermal growth factor receptor-2 (HER-2) status, nodal status, basal-like status, and triple-negative status were positively related to *RRM2* level in breast cancer samples with respect to normal tissues. Patients with increased *RRM2* showed worse overall survival, relapse-free survival, distant metastasis-free survival, disease-specific survival, and disease-free survival. *RRM2* also exerted positive effect on metastatic relapse event. Besides, a positive correlation between *RRM2* and *KIF11* genes was confirmed. **Conclusion:** Bioinformatics analysis revealed that *RRM2* might be used as a predictive biomarker for prognosis of breast cancer. Further studies are needed to more precisely elucidate the value of *RRM2* in evaluating breast cancer prognosis.

## Introduction

Breast cancer is the most frequently diagnosed tumor and a leading cause of cancer-related deaths among women worldwide [1]. Early diagnosis and treatment strategies including surgery, chemotherapy, radiotherapy, endocrine agents, and biological targeting agents have reduced patient morbidity and mortality; however, the prognosis of breast cancer remains poor. While clinical, pathological, and molecular features are widely used for establishing prognostics and predicting outcomes, finding more sensitive and specific biomarkers as surrogates of these features is the current trend in breast cancer research [2].

Ribonucleotide reductase M2 subunit (*RRM2*), a rate-limiting enzyme for DNA synthesis and repair, displays vital roles in many critical cellular processes such as cell proliferation, invasiveness, migration, angiogenesis, and senescence [3]. *RRM2* is frequently overexpressed in various malignancies and functions like a tumor driver [4–8]. Accumulating evidence has suggested that targeting *RRM2* may be a novel strategy for cancer treatment. For example, *RRM2* protected glioblastoma cells from endogenous replication stress, DNA damage, and apoptosis; *RRM2* inhibition sensitized glioblastoma cells to agent treatment [9]. Knockdown of *RRM2* attenuated melanoma growth both *in vitro* and *in vivo*, which correlated with maintenance of senescence-associated cell-cycle arrest [10]. In terms of breast cancer, both genetic suppression by RNA interference approach and pharmacological inhibition by small molecular antagonist of *RRM2* gene significantly reversed tamoxifen-resistant cell proliferation, reduced cell motility,

Received: 09 November 2018  
Revised: 08 March 2019  
Accepted: 19 March 2019

Accepted Manuscript Online:  
21 March 2019  
Version of Record published:  
09 April 2019

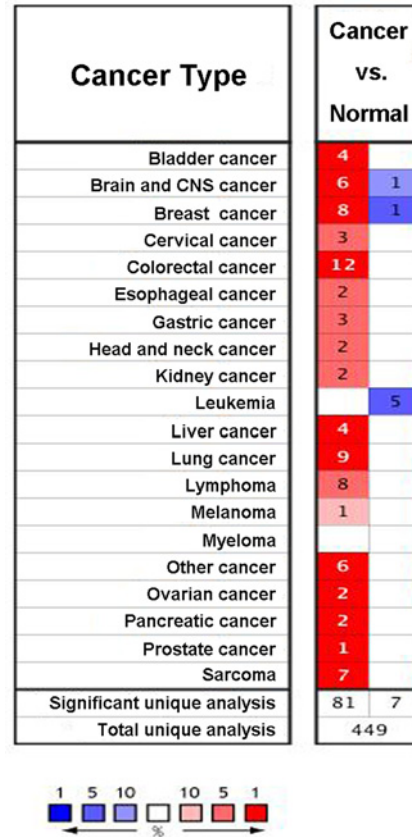

**Figure 1. Expression of *RRM2* gene in 20 types of malignant tumor and corresponding normal tissues using the Oncomine database**

Red and blue represent the numbers of datasets with statistically significant ( $P < 0.05$ ) increased and decreased levels of *RRM2* gene, respectively. Cell color is determined by the best gene rank percentile for the analyses within the cell, and the gene rank was analyzed by percentile of target genes in the top of all genes measured by each study.

activated pro-apoptotic pathways, and decreased tumor growth [11–13]. Moreover, it was reported that *RRM2* was associated with chemoresistance of breast cancer cells to adriamycin; suppression of *RRM2* synthesis could enhance the chemosensitivity to toxic insult [14]. Taken together, these findings suggest that *RRM2* may act not only as an oncogene, but also as a promising prognostic biomarker and potential therapeutic target in cancer.

Therefore, in the present study, we evaluated the significance of *RRM2* gene expression in breast cancer by using bioinformatics analysis of the clinical parameters and survival data in several large online databases.

## Materials and methods

### Oncomine

The Oncomine (<http://www.oncomine.org>), an online database containing microarray expression data from a variety of human cancers, was used to determine the level of *RRM2* in breast cancer patients and normal individuals with the threshold of fold change  $\geq 2$ ,  $P$ -value  $\leq 1E-4$ , and gene rank  $\geq$  top 10% [15]. Gene co-expressed with *RRM2* was analyzed and displayed as a heat map.

### Breast Cancer Gene-Expression Miner

The Breast Cancer Gene-Expression Miner v4.1 (bcGenExMiner v4.1, <http://bcgenex.centregauducheau.fr/BC-GEM>), a mining tool of published annotated genomics data, was utilized to evaluate the association between *RRM2* gene and clinical parameters, as well as the relevance with metastatic relapse event [16,17]. The correlation between *RRM2* and *KIF11* were generated using the correlation module.

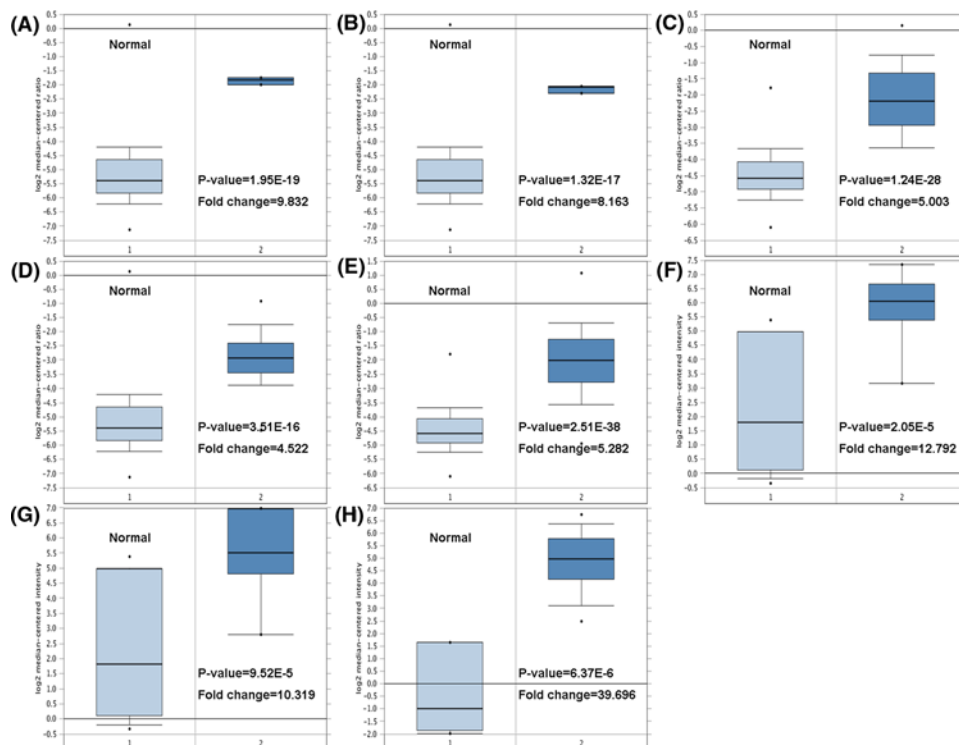

**Figure 2.** Box plot comparing *RRM2* expression in normal individuals and breast cancer patients derived from the OncoPrint database

Analysis is shown for male breast carcinoma (A), intraductal cribriform breast adenocarcinoma (B), invasive breast carcinoma (C), invasive lobular breast carcinoma (D), invasive ductal breast carcinoma (E), ductal breast carcinoma *in situ* (F), invasive ductal breast carcinoma epithelia (G), and ductal breast carcinoma (H). \* stands for the maximum and minimum values.

**Table 1** *RRM2* expression in different subtypes of breast cancer and normal tissues using the OncoPrint database

| Breast cancer subtype                            | P-value* | t test | Fold change | Patient number | Reference      |
|--------------------------------------------------|----------|--------|-------------|----------------|----------------|
| Male breast carcinoma                            | 1.95E-19 | 19.864 | 9.832       | 3              | TCGA           |
| Intraductal cribriform breast adenocarcinoma     | 1.32E-17 | 18.111 | 8.163       | 3              | TCGA           |
| Invasive breast carcinoma                        | 1.24E-28 | 14.159 | 5.003       | 76             | TCGA           |
| Invasive lobular breast carcinoma                | 3.51E-16 | 9.962  | 4.522       | 36             | TCGA           |
| Invasive ductal breast carcinoma                 | 2.51E-38 | 20.624 | 5.282       | 389            | TCGA           |
| Ductal breast carcinoma <i>in situ</i> epithelia | 2.05E-5  | 5.180  | 12.792      | 9              | PMID: 19187537 |
| Invasive ductal breast carcinoma epithelia       | 9.52E-5  | 4.513  | 10.319      | 9              | PMID: 19187537 |
| Ductal breast carcinoma                          | 6.37E-6  | 9.800  | 39.696      | 40             | PMID: 16473279 |

\*Statistical significance was determined by the Student's t test.

## Prognoscan

The Prognoscan (<http://www.prognoscan.org/>) is a large database with clinical annotation and a web-based tool for assessing the biological relationship between gene expression and prognostic information including overall survival, relapse-free survival, distant metastasis-free survival, disease-specific survival, and disease-free survival in breast cancer patients [18]. Cox P-values and hazard ratio (HR) with 95% confidence intervals were calculated automatically.

**Table 2 Relationship between *RRM2* expression and clinical parameters of breast cancer patients using the bc-GenExMiner database**

| Variables              | Patient number | <i>RRM2</i> mRNA | P-value* |
|------------------------|----------------|------------------|----------|
| Age (years)            |                |                  | 0.1700   |
| ≤51                    | 1317           | –                |          |
| >51                    | 2015           | –                |          |
| ER                     |                |                  | <0.0001  |
| Negative               | 1468           | Increased        |          |
| Positive               | 3810           | –                |          |
| PR                     |                |                  | <0.0001  |
| Negative               | 946            | Increased        |          |
| Positive               | 1439           | –                |          |
| HER-2                  |                |                  | <0.0001  |
| Negative               | 1409           | –                |          |
| Positive               | 201            | Increased        |          |
| Nodal status           |                |                  | 0.0175   |
| Negative               | 2447           | –                |          |
| Positive               | 1509           | Increased        |          |
| Basal-like status      |                |                  | <0.0001  |
| Non-basal-like         | 4089           | –                |          |
| Basal-like             | 1112           | Increased        |          |
| Triple-negative status |                |                  | <0.0001  |
| Non-triple-negative    | 3986           | –                |          |
| Triple-negative        | 374            | Increased        |          |

\*Statistical significance was determined by the Welch's test.

**Table 3 *RRM2* expression and survival data of breast cancer patients using the PrognScan database**

| Dataset        | Probe name  | End point                        | Patient number | Cox P-value | HR               |
|----------------|-------------|----------------------------------|----------------|-------------|------------------|
| GSE12276       | 209773.s.at | Relapse-free survival            | 204            | 0.001805    | 1.36 [1.12–1.65] |
| GSE6532-GPL570 | 209773.s.at | Relapse-free survival            | 87             | 0.025415    | 1.39 [1.04–1.87] |
| GSE6532-GPL570 | 209773.s.at | Distant metastasis-free survival | 87             | 0.025415    | 1.39 [1.04–1.87] |
| GSE9195        | 209773.s.at | Relapse free survival            | 77             | 0.029912    | 2.01 [1.07–3.78] |
| GSE9195        | 209773.s.at | Distant metastasis-free survival | 77             | 0.027181    | 2.30 [1.10–4.82] |
| GSE11121       | 209773.s.at | Distant metastasis-free survival | 200            | 0.001108    | 1.99 [1.32–3.02] |
| GSE2034        | 209773.s.at | Distant metastasis-free survival | 286            | 0.001001    | 1.64 [1.22–2.20] |
| GSE1456-GPL96  | 209773.s.at | Overall survival                 | 159            | 0.000074    | 2.41 [1.56–3.73] |
| GSE1456-GPL96  | 209773.s.at | Relapse-free survival            | 159            | 0.000028    | 2.53 [1.64–3.90] |
| GSE1456-GPL96  | 209773.s.at | Disease-specific survival        | 159            | 0.000014    | 3.23 [1.90–5.47] |
| GSE7378        | 201890.at   | Disease-free survival            | 54             | 0.021327    | 1.99 [1.11–3.59] |
| GSE7378        | 209773.s.at | Disease-free survival            | 54             | 0.013458    | 2.36 [1.19–4.67] |
| E-TABM-158     | 209773.s.at | Disease-specific survival        | 117            | 0.026992    | 0.71 [0.53–0.96] |
| GSE3494-GPL96  | 209773.s.at | Disease-specific survival        | 236            | 0.000122    | 2.07 [1.43–3.00] |
| GSE4922-GPL96  | 209773.s.at | Disease-free survival            | 249            | 0.000007    | 1.96 [1.46–2.63] |
| GSE2990        | 209773.s.at | Relapse-free survival            | 62             | 0.016824    | 1.73 [1.10–2.70] |
| GSE2990        | 209773.s.at | Distant metastasis-free survival | 54             | 0.012179    | 2.04 [1.17–3.56] |
| GSE7390        | 209773.s.at | Overall survival                 | 198            | 0.012109    | 1.35 [1.07–1.70] |
| GSE7390        | 209773.s.at | Distant metastasis-free survival | 198            | 0.049656    | 1.24 [1.00–1.54] |

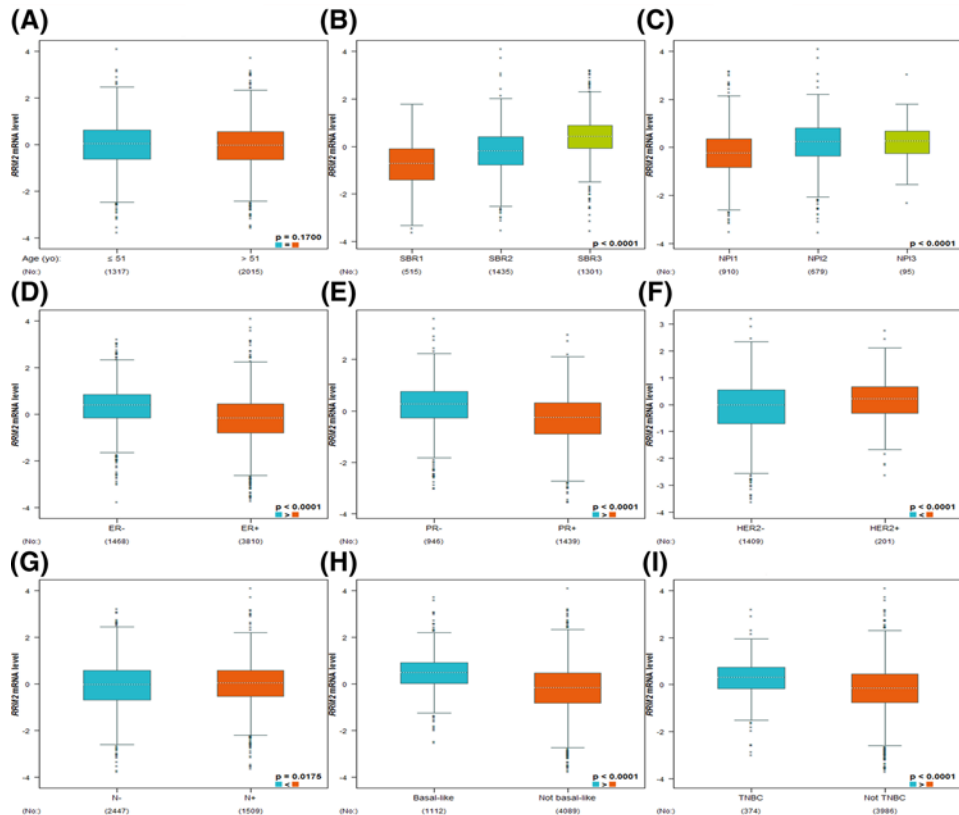

**Figure 3.** Box plot evaluating *RRM2* expression among groups of patients according to different clinical parameters using the bc-GenExMiner software

Analysis is shown for age (A), SBR (B), NPI (C), ER (D), PR (E), HER-2(F), nodal status (G), basal-like status (H), and triple-negative status (I).

## Kaplan–Meier Plotter

The Kaplan–Meier Plotter (<http://kmplot.com/analysis/>), a platform containing gene expression information and survival data of 5143 clinical breast cancer patients, was applied to verify the prognostic value of *RRM2* gene in overall survival, relapse-free survival, and distant metastasis-free survival [19].

## UCSC Xena

The heat map of *RRM2* and *KIF11* in the same patient cohort were constructed by data mining in TCGA Breast Cancer using the UCSC Xena browser (<http://xena.ucsc.edu/>).

## Results

### Increased expression of *RRM2* gene in breast cancer patients

We first checked the expression of *RRM2* gene in 20 types of malignant tumor using the Oncomine database. Increased level of *RRM2* (red) was observed in gastrointestinal cancers, gynecological cancers, urogenital cancers, and breast cancer (Figure 1). Our analysis also revealed that *RRM2* was significantly higher expressed in male breast carcinoma, intraductal cribriform breast adenocarcinoma, invasive breast carcinoma, invasive lobular breast carcinoma, invasive ductal breast carcinoma, ductal breast carcinoma *in situ*, invasive ductal breast carcinoma epithelia, and ductal breast carcinoma, compared with the corresponding normal tissues (Figure 2A–H and Table 1).

### *RRM2* expression and clinical parameters in breast cancer patients

By using the bc-GenExMiner online tool, we next compared *RRM2* expression among groups of patients, according to different clinical parameters. Regarding age, there was no significant difference between  $\leq 51$ - and  $> 51$ -year

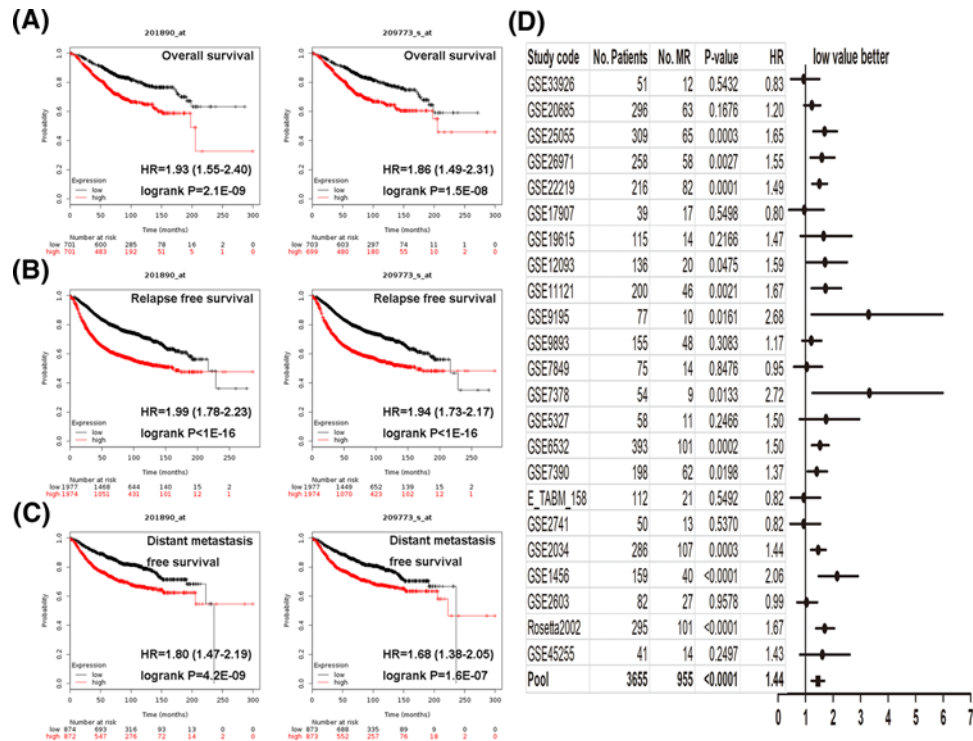

**Figure 4. Survival curve and forest plot evaluating the prognostic value of *RRM2***  
 Analysis is shown for overall survival (A), relapse-free survival (B), distant metastasis-free survival (C) using the Kaplan–Meier Plotter, and forest plot of metastatic relapse event using the bc-GenExMiner database (D).

group (Figure 3A and Table 2). The Scarff–Bloom–Richardson (SBR) is a histological grade that evaluates tubule formation, nuclear characteristics of pleiomorphism, and mitotic index. The Nottingham Prognostic Index (NPI) has been validated to stratify patients into additional prognostic groups according to tumor size, lymph node stage, and tumor grade. Breast cancer patients with more advanced SBR grade and NPI tended to express higher *RRM2* gene (Figure 3B,C). Estrogen receptor (ER) and progesterone receptor (PR) status were negatively associated with *RRM2* expression (Figure 3D,E and Table 2). Conversely, human epidermal growth factor receptor-2 (HER-2) status was confirmed to correlate positively with *RRM2* expression (Figure 3F and Table 2). Breast cancer patients with positive nodal status (N) showed increased level of *RRM2* than those with negative nodal status (Figure 3G and Table 2). Besides, we found that *RRM2* was strongly elevated in basal-like subtype with respect to non-basal-like subtype; the same pattern of change was also observed in triple-negative breast cancer (TNBC) patients (Figure 3H,I and Table 2).

### ***RRM2* expression and prognosis in breast cancer patients**

We then investigated the prognostic value of *RRM2* gene. The Kaplan–Meier curves indicated that lower level of *RRM2* correlated with preferable overall survival (Figure 4A). While breast cancer patients with up-regulated *RRM2* demonstrated worse relapse-free survival (Figure 4B), patients with decreased *RRM2* expression presented better distant metastasis-free survival (Figure 4C). Furthermore, *RRM2* exerted positive effect on metastatic relapse event, as suggested by the forest plot using the bc-GenExMiner tool (Figure 4D). The Prognoscan database showed that overexpression of *RRM2* was significantly associated with inferior overall survival, relapse-free survival, distant metastasis-free survival, disease-specific survival, and disease-free survival (Table 3).

### **Co-expression of *RRM2* gene**

To further investigate the underlying regulation of *RRM2* in breast cancer, data mining of the co-expression of *RRM2* gene was performed using the OncoPrint database. The co-expression profile of *RRM2* was identified with a large cluster of 1802 genes across 61 breast carcinomas, and *KIF11* is a principal correlated gene (Figure 5A). Data mining in bc-GenExMiner revealed a positive correlation between *RRM2* and *KIF11* (Figure 5B). By comparing the *RRM2*

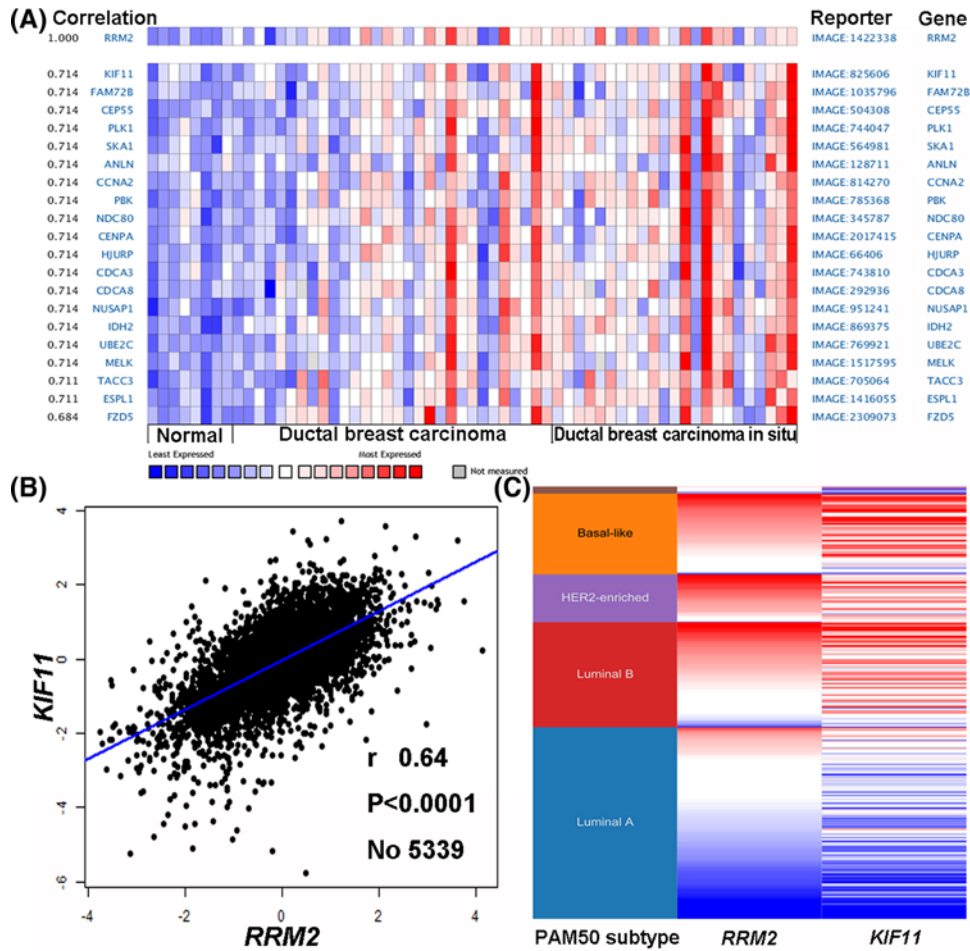

**Figure 5. Co-expression of *RRM2* gene**

(A) Co-expression profile of *RRM2* identified using the OncoPrint database. (B) Correlation between *RRM2* and *KIF11* expression in breast cancer analyzed using the bc-GenExMiner software. (C) Heat map of *RRM2* and *KIF11* expression across PAM50 breast cancer subtypes in the TCGA database obtained from the UCSC Xena web-based tool.

and *KIF11* expression heat map derived from the UCSC Xena web-based tool, it was confirmed that *RRM2* expression gradually elevated with increasing *KIF11* transcript level, which was determined among a 50-gene qPCR assay (PAM50) breast cancer subtypes in TCGA database (Figure 5C). These data indicated that *RRM2* could be associated with the *KIF11* signaling pathways in breast cancer.

## Discussion

*RRM2* plays vital roles in diverse cellular functions such as cell proliferation, invasiveness, migration, angiogenesis, senescence, and tumorigenesis [3]. It was reported that *RRM2* was associated with resistance of breast cancer cells to chemotherapy and endocrine agents and that targeting *RRM2* may be a novel strategy for cancer treatment [11–14]. However, the significance of *RRM2* expression in prognosis of breast cancer remains largely unclear.

In the present work, we analyzed the expression profile of *RRM2* by OncoPrint database. *RRM2* gene was higher expressed in male breast carcinoma, intraductal cribriform breast adenocarcinoma, invasive breast carcinoma, invasive lobular breast carcinoma, invasive ductal breast carcinoma, ductal breast carcinoma *in situ*, invasive ductal breast carcinoma epithelia, and ductal breast carcinoma patients, with respect to normal individuals. By using the bc-GenExMiner online tool, we found that ER and PR were negatively correlated with *RRM2* expression. Conversely, SBR, NPI, HER-2 status, nodal status, basal-like status, and triple-negative status were positively related to *RRM2* level in breast cancer samples with respect to normal tissues. As known to all, patients with ER or PR negative, nodal positive, HER-2 positive, basal-like or triple-negative status generally display an unsatisfied therapeutic response and

worse clinical outcome. Therefore, our results suggested that lower expression of *RRM2* may predict a better prognosis of breast cancer.

We further investigated the prognostic value of *RRM2* in breast cancer using the Kaplan–Meier Plotter, PrognoScan, and bc-GenExMiner databases. Patients with increased *RRM2* showed worse overall survival, relapse-free survival, distant metastasis-free survival, disease-specific survival, and disease-free survival. Additionally, high *RRM2* expression was correlated with an increased risk of metastatic relapse event, as suggested by the forest plot. These findings collectively demonstrated that the level of *RRM2* might be a useful predictive biomarker for prognosis of breast cancer. We finally analyzed the co-expression of *RRM2* using the OncoPrint, bc-GenExMiner, and UCSC Xena web-based tools and confirmed that *KIF11* gene was positively correlated with *RRM2* expression. *KIF11*, a molecular motor protein involved in mitosis, was critical for proliferation and self-renewal in chemoresistant breast cancer cells [20]. *KIF11* knockdown inhibited tumor growth both *in vitro* and *in vivo*, and its expression was responsible for shorter survival time [21]. Thus, our data indicated that *RRM2* might contribute to breast cancer progression and drug insensitivity associated with *KIF11* expression.

In summary, the present bioinformatics analysis showed that *RRM2* was overexpressed in breast cancer patients with respect to normal tissues and was associated with a worse survival. *RRM2* could be used as a predictive biomarker for prognosis of breast cancer with co-expressed *KIF11* gene. Further studies are needed to more precisely elucidate the value of *RRM2* in evaluating breast cancer prognosis.

## Funding

This work was supported by the Natural Science Foundation of China [grant number 81702591]; and the Natural Science Foundation of Jiangsu Province [grant number BK20170294].

## Competing interests

The authors declare that there are no competing interests associated with the manuscript.

## Author contribution

Conceived and designed the experiments: W.-X.C. and L.-G.Y. Analyzed the data: W.-X.C., L.-Y.X., and L.C. Contributed analysis tools: Q.Q., L.S., and Y.-L.Z. Wrote the paper: W.-X.C.

## Abbreviations

bc-GenExMiner, Breast Cancer Gene-Expression Miner; ER, estrogen receptor; HER-2, human epidermal growth factor receptor-2; NPI, Nottingham Prognostic Index; PR, progesterone receptor; *RRM2*, ribonucleotide reductase M2 subunit; SBR, Scarff–Bloom–Richardson.

## References

- Fan, L., Strasser-Weippl, K., Li, J.J., St Louis, J., Finkelstein, D.M., Yu, K.D. et al. (2014) Breast cancer in China. *Lancet Oncol.* **15**, e279–e289, [https://doi.org/10.1016/S1470-2045\(13\)70567-9](https://doi.org/10.1016/S1470-2045(13)70567-9)
- Duffy, M.J., Walsh, S., McDermott, E.W. and Crown, J. (2015) Biomarkers in breast cancer: where are we and where are we going. *Adv. Clin. Chem.* **71**, 1–23, <https://doi.org/10.1016/bs.acc.2015.05.001>
- Nordlund, P. and Reichard, P. (2006) Ribonucleotide reductases. *Annu. Rev. Biochem.* **75**, 681–706, <https://doi.org/10.1146/annurev.biochem.75.103004.142443>
- Li, J., Pang, J., Liu, Y., Zhang, J., Zhang, C., Shen, G. et al. (2018) Suppression of *RRM2* inhibits cell proliferation, causes cell cycle arrest and promotes the apoptosis of human neuroblastoma cells and in human neuroblastoma *RRM2* is suppressed following chemotherapy. *Oncol. Rep.* **40**, 355–360
- Han, P., Chen, R.H., Wang, F., Zeng, J.Y., Yu, S.T., Xu, L.H. et al. (2017) Novel chimeric transcript *RRM2-c2orf48* promotes metastasis in nasopharyngeal carcinoma. *Cell Death Dis.* **8**, e3047
- Zhong, Z., Cao, Y., Yang, S. and Zhang, S. (2016) Overexpression of *RRM2* in gastric cancer cell promotes their invasiveness via AKT/NF-kappaB signaling pathway. *Pharmazie* **71**, 280–284
- Grolmusz, V.K., Karasz, K., Micsik, T., Toth, E.A., Meszaros, K., Karvaly, G. et al. (2016) Cell cycle dependent *RRM2* may serve as proliferation marker and pharmaceutical target in adrenocortical cancer. *Am. J. Cancer Res.* **6**, 2041–2053
- Grossi, F., Dal Bello, M.G., Salvi, S., Puzone, R., Pfeffer, U., Fontana, V. et al. (2015) Expression of ribonucleotide reductase subunit-2 and thymidylate synthase correlates with poor prognosis in patients with resected stages I–III non-small cell lung cancer. *Dis. Markers* **2015**, 302649, <https://doi.org/10.1155/2015/302649>
- Rasmussen, R.D., Gajjar, M.K., Tuckova, L., Jensen, K.E., Maya-Mendoza, A. and Holst, C.B. (2016) *BRCA1*-regulated *RRM2* expression protects glioblastoma cells from endogenous replication stress and promotes tumorigenicity. *Nat Commun.* **7**, 13398
- Fatkhutdinov, N., Sproesser, K., Krepler, C., Liu, Q., Brafford, P.A., Herlyn, M. et al. (2016) Targeting *RRM2* and mutant *BRAF* is a novel combinatorial strategy for melanoma. *Mol. Cancer Res.* **14**, 767–775, <https://doi.org/10.1158/1541-7786.MCR-16-0099>



- 11 Shah, K.N., Mehta, K.R., Peterson, D., Evangelista, M., Livesey, J.C. and Faridi, J.S. (2014) AKT-induced tamoxifen resistance is overturned by RRM2 inhibition. *Mol. Cancer Res.* **12**, 394–407, <https://doi.org/10.1158/1541-7786.MCR-13-0219>
- 12 Putluri, N., Maity, S., Kommagani, R., Creighton, C.J., Putluri, V., Chen, F. et al. (2014) Pathway-centric integrative analysis identifies RRM2 as a prognostic marker in breast cancer associated with poor survival and tamoxifen resistance. *Neoplasia* **16**, 390–402, <https://doi.org/10.1016/j.neo.2014.05.007>
- 13 Shah, K.N., Wilson, E.A., Malla, R., Eلفord, H.L. and Faridi, J.S. (2015) Targeting ribonucleotide reductase M2 and NF-kappaB activation with Didox to circumvent tamoxifen resistance in breast cancer. *Mol. Cancer Ther.* **14**, 2411–2421, <https://doi.org/10.1158/1535-7163.MCT-14-0689>
- 14 Zhang, H., Liu, X., Warden, C.D., Huang, Y., Loera, S., Xue, L. et al. (2014) Prognostic and therapeutic significance of ribonucleotide reductase small subunit M2 in estrogen-negative breast cancers. *BMC Cancer* **14**, 664, <https://doi.org/10.1186/1471-2407-14-664>
- 15 Rhodes, D.R., Yu, J., Shanker, K., Deshpande, N., Varambally, R., Ghosh, D. et al. (2004) ONCOMINE: a cancer microarray database and integrated data-mining platform. *Neoplasia* **6**, 1–6, [https://doi.org/10.1016/S1476-5586\(04\)80047-2](https://doi.org/10.1016/S1476-5586(04)80047-2)
- 16 Jezequel, P., Campone, M., Gouraud, W., Guerin-Charbonnel, C., Leux, C., Ricolleau, G. et al. (2012) bc-GenExMiner: an easy-to-use online platform for gene prognostic analyses in breast cancer. *Breast Cancer Res. Treat.* **131**, 765–775, <https://doi.org/10.1007/s10549-011-1457-7>
- 17 Jezequel, P., Frenel, J.S., Campion, L., Guerin-Charbonnel, C., Gouraud, W., Ricolleau, G. et al. (2013) bc-GenExMiner 3.0: new mining module computes breast cancer gene expression correlation analyses. *Database* **2013**, bas060, <https://doi.org/10.1093/database/bas060>
- 18 Mizuno, H., Kitada, K., Nakai, K. and Sarai, A. (2009) PrognoScan: a new database for meta-analysis of the prognostic value of genes. *BMC Med. Genet.* **2**, 18
- 19 Gyorfy, B., Lanczky, A., Eklund, A.C., Denkert, C., Budczies, J., Li, Q. et al. (2010) An online survival analysis tool to rapidly assess the effect of 22,277 genes on breast cancer prognosis using microarray data of 1,809 patients. *Breast Cancer Res. Treat.* **123**, 725–731, <https://doi.org/10.1007/s10549-009-0674-9>
- 20 Jiang, M., Zhuang, H., Xia, R., Gan, L., Wu, Y., Ma, J. et al. (2017) KIF11 is required for proliferation and self-renewal of docetaxel resistant triple negative breast cancer cells. *Oncotarget* **8**, 92106–92118, <https://doi.org/10.18632/oncotarget.20785>
- 21 Pei, Y.Y., Li, G.C., Ran, J. and Wei, F.X. (2017) Kinesin family member 11 contributes to the progression and prognosis of human breast cancer. *Oncol. Lett.* **14**, 6618–6626
